# Supplementary material for: Erythrocyte survival is controlled by microRNA-142
Source: PubMed Central journal article supplement — Haematologica. 2016 Dec 1;102(4):676–85. doi: 10.3324/haematol.2016.156109 (PMC5395108; doi:10.3324/haematol.2016.156109), 2017-04
Supplement: 2016_156109-Disclosures_and_Contributions.pdf [file 2016_156109-Disclosures_and_Contributions.pdf]

Haematologica  
HAEMATOL/2016/156109  
Version 3

Erythrocyte survival is controlled by microRNA-142

Natalia Rivkin, Elik Chapnik, Alexander Mildner, Gregory Barshtein, Ziv Porat, Elena Kartvelishvily, Tali Dadosh, Yehudit Birger, Gail Amir, Saul Yedgar, Shai Izraeli, Steffen Jung, and Eran Hornstein

Disclosures: none

Contributions: Natalia Rivkin: Conceived and led the project, contributed substantially to research conception and design. N.R. developed the interpretations presented and wrote the manuscript with E.H. and provided approval of the version to be published. Elik Chapnik: Contributed substantially to research conception and design, experimentations and data analysis including establishing the miR-142 loss of function allele. Provided approval of the version to be published. Gregory Barshtein: Performed erythrocyte deformability assays and provided approval of the version to be published. Alexander Mildner: Experimentations and data analysis. He provided approval of the version to be published. Ziv Porat: Performed ImageStream flow cytometry including acquisition of data, analysis of data critical for drafting the article and provided approval of the version to be published. Yehudit Birger: Helped performing research and provided approval of the version to be published. Gail Amir: Performed histological analysis and provided approval of the version to be published. Tali Dadosh: Performed super resolution microscopy including acquisition of data, analysis of data critical for drafting the article and provided approval of the version to be published. Elena Kartvelishvily: Performed scanning electron microscopy including acquisition of data, analysis of data critical for drafting the article and provided approval of the version to be published. Saul Yedgar: Provided, resources. Provided critically important intellectual content and provided approval of the version to be published. Shai Izraeli: Provided critical input, resources and scientific interpretations of data. Provided critically important intellectual content and provided approval of the version to be published. Steffen Jung: Provided critical input, resources and scientific interpretations of data. Provided critically important intellectual content and provided approval of the version to be published. Eran Hornstein: Conceived and supervised the study, developed the interpretations presented, wrote the manuscript and provided approval of the version to be published.
